# Supplementary material
Source: PubMed Central journal article supplement (PMC5352984)
Supplement: NIHMS852619-supplement-Supplemental_information.pdf [file NIHMS852619-supplement-Supplemental_information.pdf]

**Discovery of Potent and Selective Inhibitors for G9a-Like Protein (GLP) Lysine Methyltransferase**

Yan Xiong,<sup>†</sup> Fengling Li,<sup>‡</sup> Nicolas Babault,<sup>†</sup> Aiping Dong,<sup>‡</sup> Hong Zeng,<sup>‡</sup> Hong Wu,<sup>‡</sup> Xin Chen,<sup>†</sup> Cheryl H. Arrowsmith,<sup>‡,⊥</sup> Peter J. Brown,<sup>‡</sup> Jing Liu,<sup>†</sup> Masoud Vedadi,<sup>\*,‡,§</sup> and Jian Jin<sup>\*,†</sup>

**Table of Contents**

|    |                                                                                   |    |
|----|-----------------------------------------------------------------------------------|----|
| A. | <sup>1</sup> H and <sup>13</sup> C NMR spectra of <b>4</b>                        | S2 |
| B. | <sup>1</sup> H and <sup>13</sup> C NMR spectra of <b>18</b>                       | S3 |
| C. | Supporting Table S1. Crystallography data and refinement statistics for <b>4</b>  | S4 |
| D. | Supporting Table S3. Crystallography data and refinement statistics for <b>18</b> | S6 |

# NMR spectra of compound 4

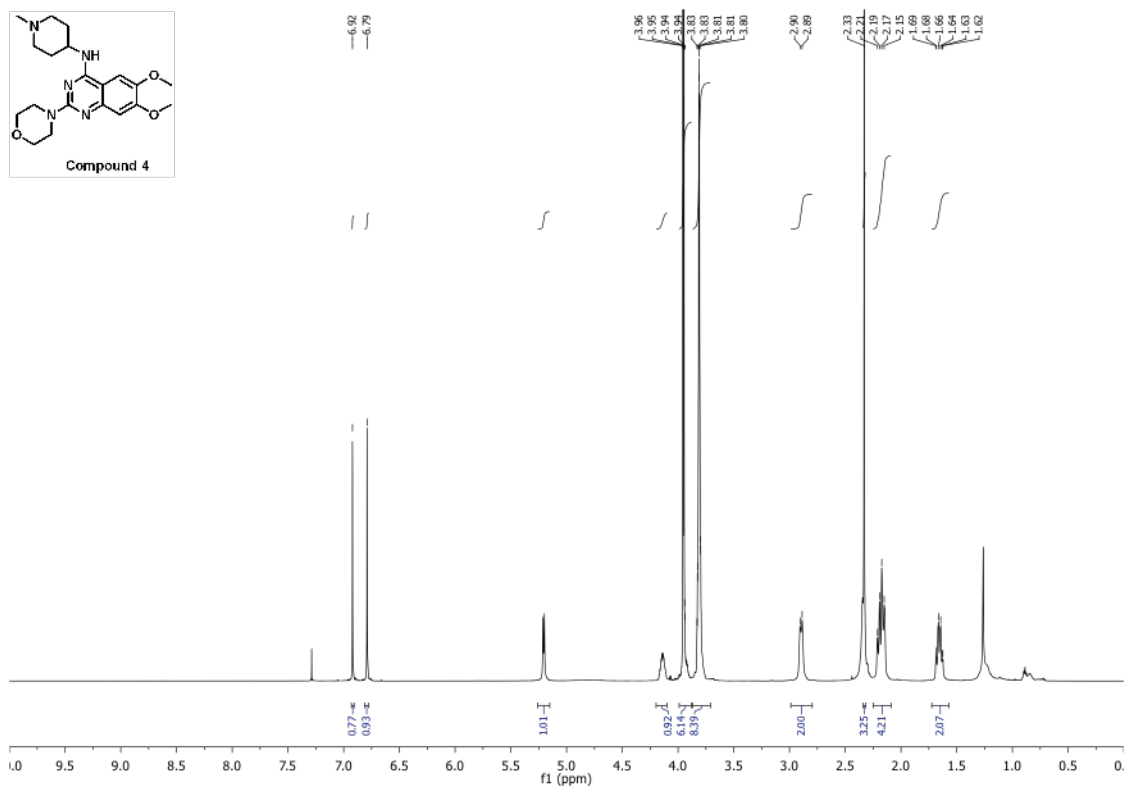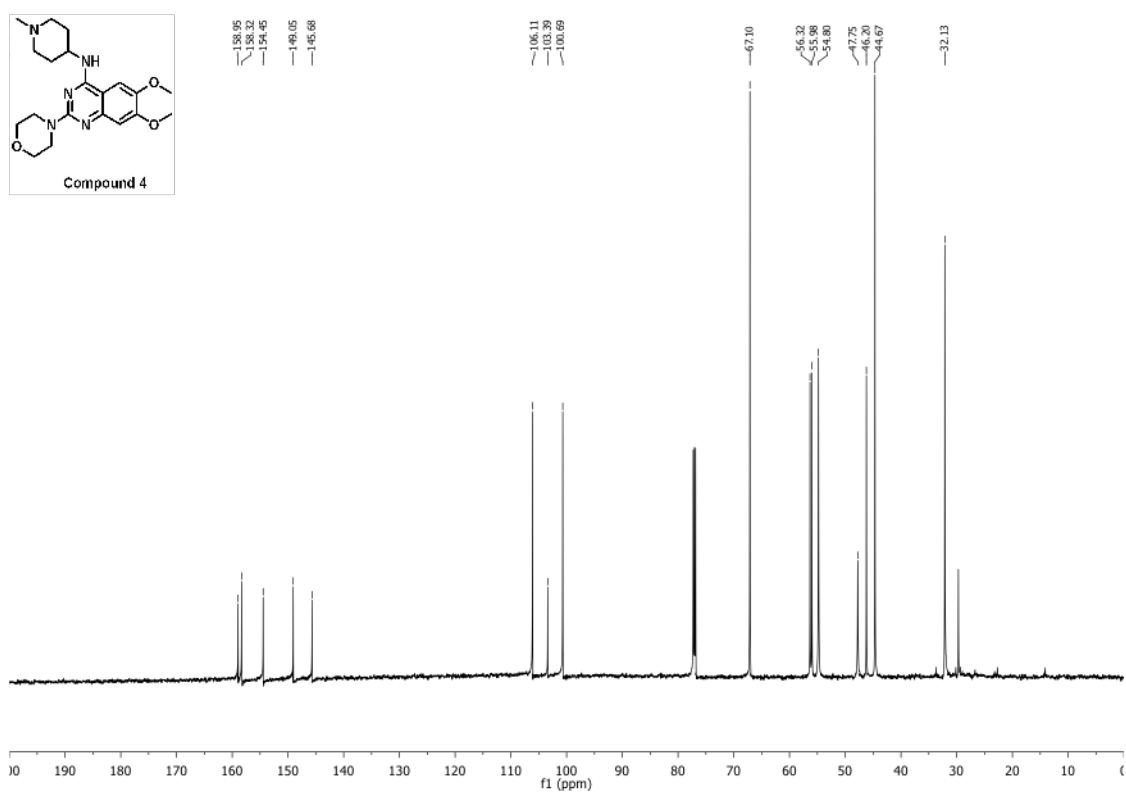

# $^1\text{H}$ and $^{13}\text{C}$ NMR spectra of **18**

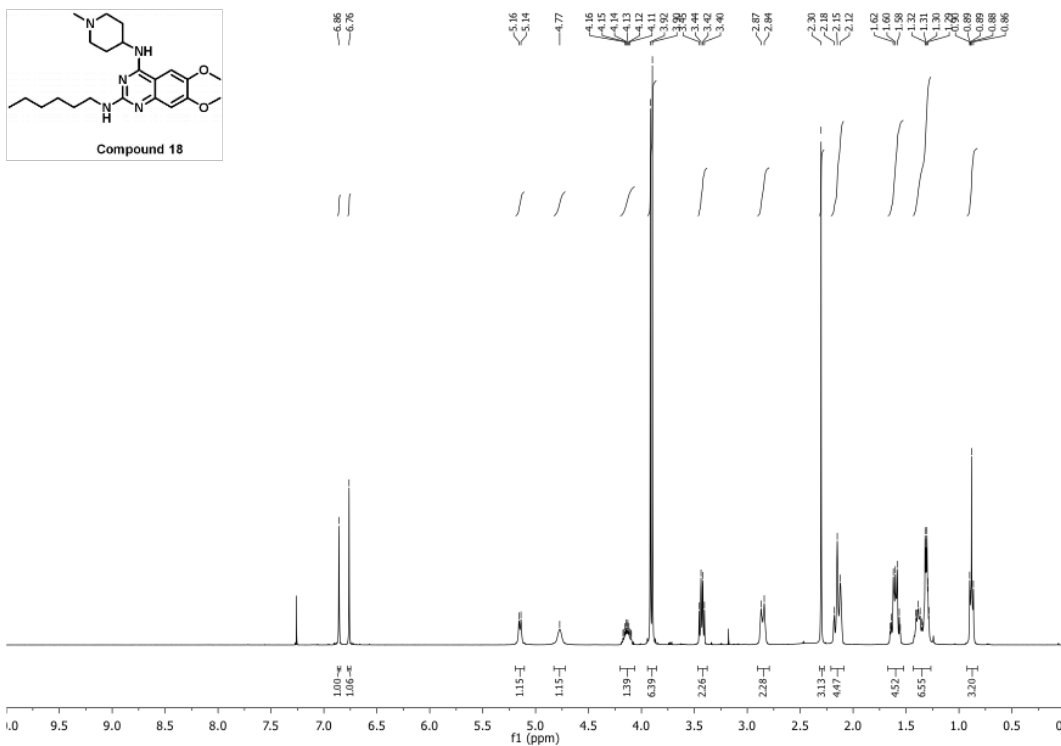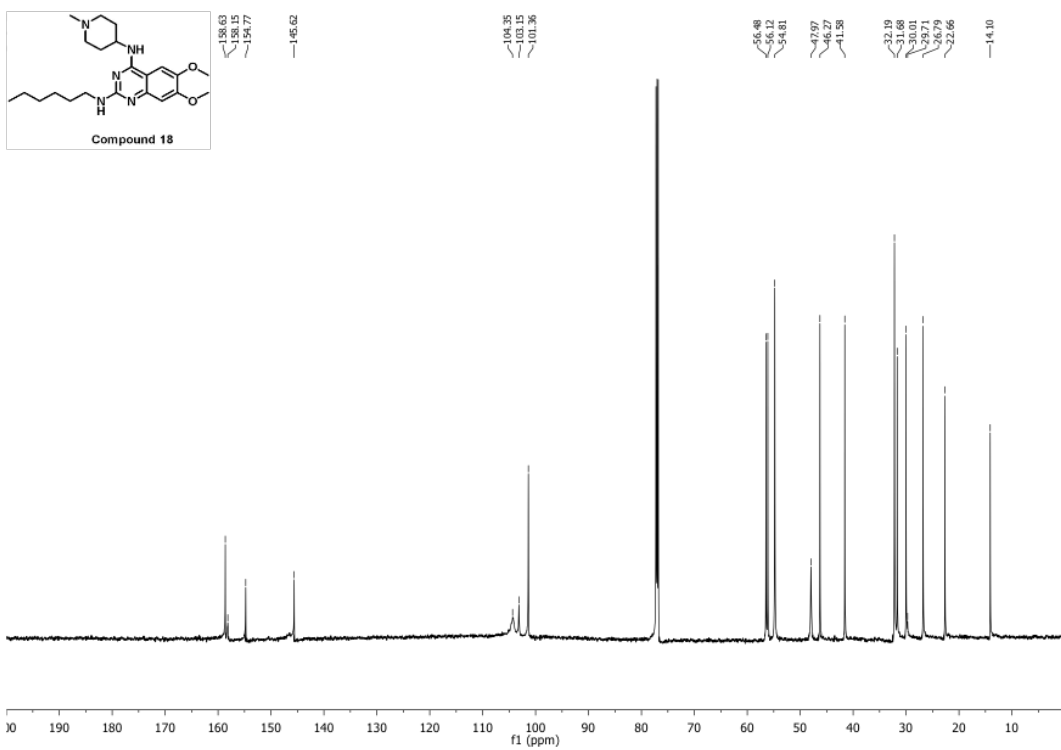

**Supporting Table S1. Crystallography data and refinement statistics for 4.**

|                                                     | GLP-SAM/4                                     | G9a-SAM/4               |
|-----------------------------------------------------|-----------------------------------------------|-------------------------|
| <b>Data collection</b>                              |                                               |                         |
| Space group                                         | P2 <sub>1</sub> 2 <sub>1</sub> 2 <sub>1</sub> | P1211                   |
| Cell dimensions                                     |                                               |                         |
| <i>a, b, c</i> (Å)                                  | 74.94, 95.78, 102.36                          | 56.97, 82.30, 73.74     |
| $\alpha, \beta, \gamma$ (°)                         | 90.00, 90.00, 90.00                           | 90.00, 89.97, 90.00     |
| Molecule per asymmetric unit                        | 2                                             | 2                       |
| Resolution (Å)                                      | 74.94-1.95 (2.06-1.95)*                       | 82.30-2.60 (2.74-2.60)* |
| <i>R</i> <sub>sym</sub>                             | 0.146 (0.655)                                 | 0.207 (0.728)           |
| <i>I</i> / $\sigma$ <i>I</i>                        | 10.5 (3.2)                                    | 4.9 (1.8)               |
| Completeness (%)                                    | 99.8 (99.7)                                   | 100.0 (100.0)           |
| Redundancy                                          | 6.8 (6.1)                                     | 3.9 (3.9)               |
| <b>Refinement</b>                                   |                                               |                         |
| Resolution (Å)                                      | 1.95                                          | 2.60                    |
| No. unique reflections                              | 54301 (7802)                                  | 21095 (3083)            |
| <i>R</i> <sub>work</sub> / <i>R</i> <sub>free</sub> | 0.160/0.198                                   | 0.171/0.234             |
| No. atoms /average B-factor [Å <sup>2</sup> ]       | 4640/25.2                                     | 4484/33.4               |
| Protein                                             | 4174/25.1                                     | 4210/38.9               |
| Zn                                                  | 8/17.6                                        | 8/32.6                  |
| SAM                                                 | 54/40.2                                       | 54/25.4                 |
| Compound                                            | 56/30.4                                       | 56/34.7                 |
| Other                                               | 8/42.5                                        | 0/0                     |
| Water                                               | 340/26.4                                      | 156/24.3                |
| R.m.s deviations                                    |                                               |                         |

---

|                         |       |       |
|-------------------------|-------|-------|
| Bond lengths (Å)        | 0.008 | 0.010 |
| Bond angles (°)         | 1.09  | 1.1   |
| Ramachandran plot       |       |       |
| Most favoured (%)       | 95.9  | 95.8  |
| Additional allowed (%)  | 4.1   | 3.4   |
| Outliers (%)            | 0     | 0.8   |
| Protein Data Bank entry | 5TUZ  | 5TUY  |

---

\*The values in parentheses refer to statistics in the highest bin.

**Supporting Table S2. Crystallography data and refinement statistics for 18.**

|                                                     | GLP-SAM/18                                    | G9a-SAM/18              |
|-----------------------------------------------------|-----------------------------------------------|-------------------------|
| <b>Data collection</b>                              |                                               |                         |
| Space group                                         | P2 <sub>1</sub> 2 <sub>1</sub> 2 <sub>1</sub> | P1                      |
| Cell dimensions                                     |                                               |                         |
| <i>a, b, c</i> (Å)                                  | 74.43,95.90,102.11                            | 56.85, 67.75, 77.85     |
| $\alpha, \beta, \gamma$ (°)                         | 90.00, 90.00, 90.00                           | 92.10,90.05,91.80       |
| Molecule per asymmetric unit                        | 2                                             | 4                       |
| Resolution (Å)                                      | 50.00-1.66 (1.69-1.66)*                       | 50.00-1.72 (1.75-1.72)* |
| <i>R</i> <sub>sym</sub>                             | 0.118 (0.883)                                 | 0.075 (0.550)           |
| <i>I</i> / $\sigma$ <i>I</i>                        | 25.2 (2.3)                                    | 23.9 (1.7)              |
| Completeness (%)                                    | 100.00 (100.0)                                | 96.4 (83.5)             |
| Redundancy                                          | 6.8 (6.5)                                     | 3.1 (2.5)               |
| <b>Refinement</b>                                   |                                               |                         |
| Resolution (Å)                                      | 1.66                                          | 1.72                    |
| No. of reflections                                  | 84739 (1745)                                  | 117616(1275)            |
| <i>R</i> <sub>work</sub> / <i>R</i> <sub>free</sub> | 0.170/0.192                                   | 0.206/0.247             |
| No. atoms /average B-factor [Å <sup>2</sup> ]       | 5094/22.4                                     | 9228/29.8               |
| Protein                                             | 4338/21.0                                     | 8420/29.6               |
| Zn                                                  | 8/15.6                                        | 16/25.4                 |
| SAM                                                 | 54/20.8                                       | 108/26.6                |
| Compound                                            | 49/23.9                                       | 96/36.0                 |
| Water                                               | 645/32.1                                      | 588/32.1                |
| R.m.s deviations                                    |                                               |                         |
| Bond lengths (Å)                                    | 0.009                                         | 0.011                   |

---

|                         |       |       |
|-------------------------|-------|-------|
| Bond angles (°)         | 1.448 | 1.488 |
| Ramachandran plot       |       |       |
| Most favoured (%)       | 96.6  | 95.4  |
| Additional allowed (%)  | 3.4   | 4.6   |
| Outliers (%)            | 0     | 0     |
| Protein Data Bank entry | 5TTG  | 5TTF  |

---

\*The values in parentheses refer to statistics in the highest bin.
